# Supplementary material for: Anti-Inflammatory Activity of Boswellia serrata Extracts: An In Vitro Study on Porcine Aortic Endothelial Cells
Source: PubMed Central journal article supplement (PMC6036794; doi:10.1155/2018/2504305), 2018-06-25
Supplement: 2504305.f1.pdf [file 2504305.f1.pdf]

## Supplementary Materials

Table S1. KBA and  $\beta$ BA quantification in five *Boswellia serrata* dry extracts (B-F). Data are reported as mean  $\pm$  SD (n = 3). Concentration is expressed in mg/g of dry extract.

| Sample | KBA<br>Concentration | $\beta$ BA<br>Concentration |
|--------|----------------------|-----------------------------|
| B      | 28.74 $\pm$ 2.73     | 85.07 $\pm$ 5.97            |
| C      | nd                   | nd                          |
| D      | 34.47 $\pm$ 3.93     | 115.35 $\pm$ 13.90          |
| E      | 46.12 $\pm$ 6.75     | 115.56 $\pm$ 14.76          |
| F      | 24.65 $\pm$ 1.59     | 82.70 $\pm$ 10.97           |

*nd = not detected*

The supplementary material is a table reporting the concentrations of the two boswellic acids analyzed and discussed in the manuscript in five additional dry extracts of *Boswellia serrata*. The table **has been** added to emphasize the variability of boswellic acid concentration in different dry extracts obtained from the same botanical species.
